# Supplementary material for: Poly(vinyl alcohol)/Plant Extracts Films: Preparation, Surface Characterization and Antibacterial Studies against Gram Positive and Gram Negative Bacteria
Source: MDPI journal article supplement (doi:10.3390/ma15072493), 2022-03-28
Supplement: s1 [file s1]

# Poly(vinyl alcohol)/Plant Extracts Films: Preparation, Surface Characterization and Antibacterial Studies against Gram Positive and Gram Negative Bacteria

## ATR-FTIR analysis

The objective of ATR-FTIR analysis was to investigate the registered peaks corresponding to the functional groups (OH-, C-O, C-H) indicating the presence of the phenols acid, terpenoids or flavonoids compounds and to observe the influence of plant extracts on each PVA formulations.

**Table S1.** ATR-FTIR bands present in each films of neat PVA and PVA loaded with plant extracts.

| Wavenumbers (cm <sup>-1</sup> ) |        |        |        |        |        | Bond | Type of compounds                                                                                                                                                                | References    |
|---------------------------------|--------|--------|--------|--------|--------|------|----------------------------------------------------------------------------------------------------------------------------------------------------------------------------------|---------------|
| PVA                             | PVA-LE | PVA-ME | PVA-SE | PVA-CE | PVA-VE |      |                                                                                                                                                                                  |               |
| 333                             | 3322   | 3315   | 3359   | 3320   | 3319   | O-H  | Hydrogen bonded alcohol, phenols, v(OH)                                                                                                                                          | [11,42,52–53] |
| 2938                            | 2919   | 2919   | 2920   | 2919   | 2920   | C-H  | Stretching v <sub>as</sub> (CH <sub>3</sub> ), v <sub>as</sub> (CH <sub>2</sub> )                                                                                                | [3,43–45]     |
| 2850                            | 2854   | 2851   | 2851   | 2850   | 2848   | C-H  | Stretching v <sub>s</sub> (CH <sub>2</sub> )                                                                                                                                     | [4,43–44]     |
| 1733                            | 1733   | 1734   | 1736   | 1730   | 1732   | C=O  | Stretching v(C=O)                                                                                                                                                                | [4,46–49,56]  |
| 1593                            | 1594   | 1609   | 1611   | 1601   | 1602   | C=C  | Stretching v(C=C), aromatic ring bands                                                                                                                                           | [14,48]       |
| 1426                            | 1427   | 1436   | 1458   | 1434   | 1435   | C-H  | δ <sub>s</sub> (CH <sub>2</sub> ) and δ(CH <sub>3</sub> ), bending, in plane (C-H in CH <sub>2</sub> groups); stretching (C-O-C) of unhydrolyzed acetate groups, in plane (O=H); | [42,53–54]    |
| 1373,                           | 1374,  | 1375,  | 1375,  | 1374,  | 1374,  | C-H  | δ <sub>s</sub> (CH <sub>3</sub> ), δ(CH <sub>2</sub> ); Bending, in plane (C-H) in CH <sub>2</sub> groups;                                                                       | [42,53]       |
| 1243                            | 1246   | 1247   | 1245   | 1244   | 1247.8 | C-H  |                                                                                                                                                                                  |               |
| 1092                            | 1079   | 1081   | 1082   | 1140   | 1086   | C-O  | Alcohol, ethers, carboxylic acid, ester, v(C-O-C)                                                                                                                                | [44,50–51]    |
| 1024                            | 1045   | 1034   | 1025   | 1091   | 1048   | C-O  | Alcohol, ethers, carboxylic acid, ester, v(C-O), bending (O-H)                                                                                                                   | [4,53,55]     |
| 874                             | 848    | 838.9  | 851.1  | 848.6  | 842.1  | C-H  | δ (C-H) deformations, Stretching (bending out of plane) (C-H)                                                                                                                    | [44–45,56–57] |

<sup>a</sup>as, asymmetric; s, symmetric; v, stretching; δ, in-plane bending

## Scanning Electron Microscopy (SEM)

The SEM images indicate that the surface of the film without addition of plant extracts was smooth and homogenous. The incorporation of the tested plant extracts films showed a rough surface without cracks or any visible pores compared to the control PVA film.

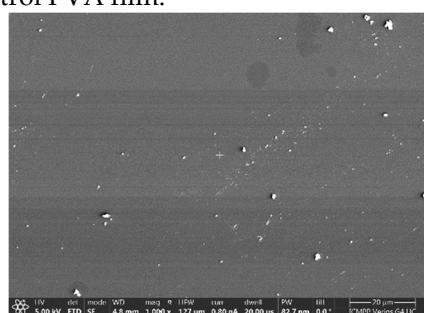

(a)

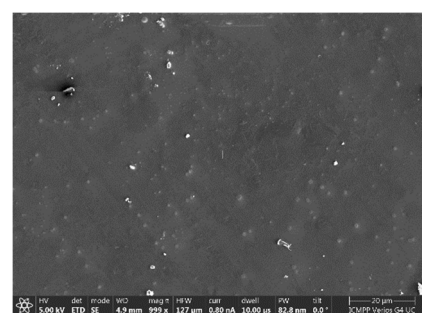

(b)

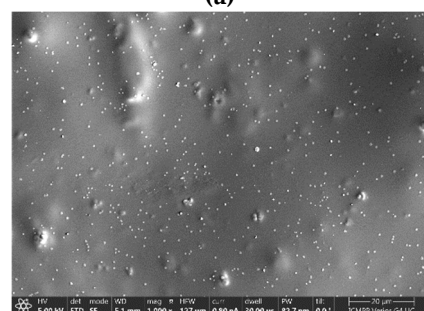

(c)

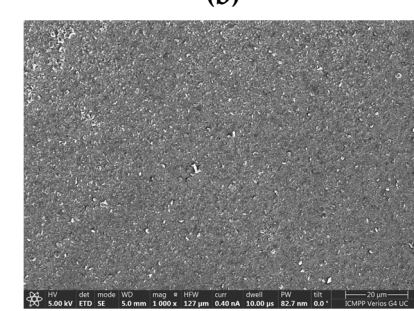

(d)

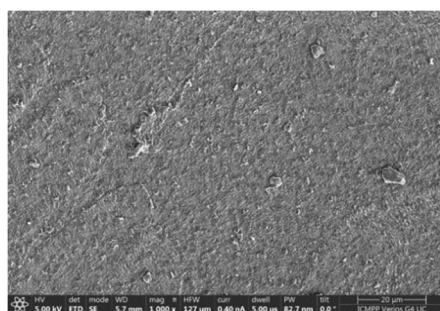

(e)

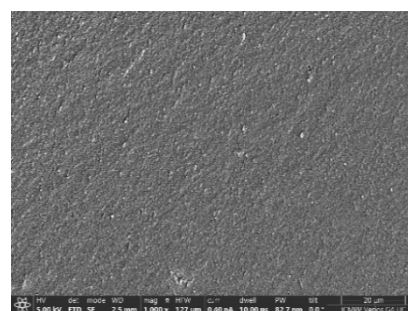

(f)

**Figure S1.** PVA (a); PVA-VE (b); PVA-ME (c); PVA-LE (d); PVA-CE (e); PVA-SE (f).
